# Supplementary material
Source: PubMed Central journal article supplement (PMC6754290)
Supplement: NIHMS1533825-supplement-1.pdf [file NIHMS1533825-supplement-1.pdf]

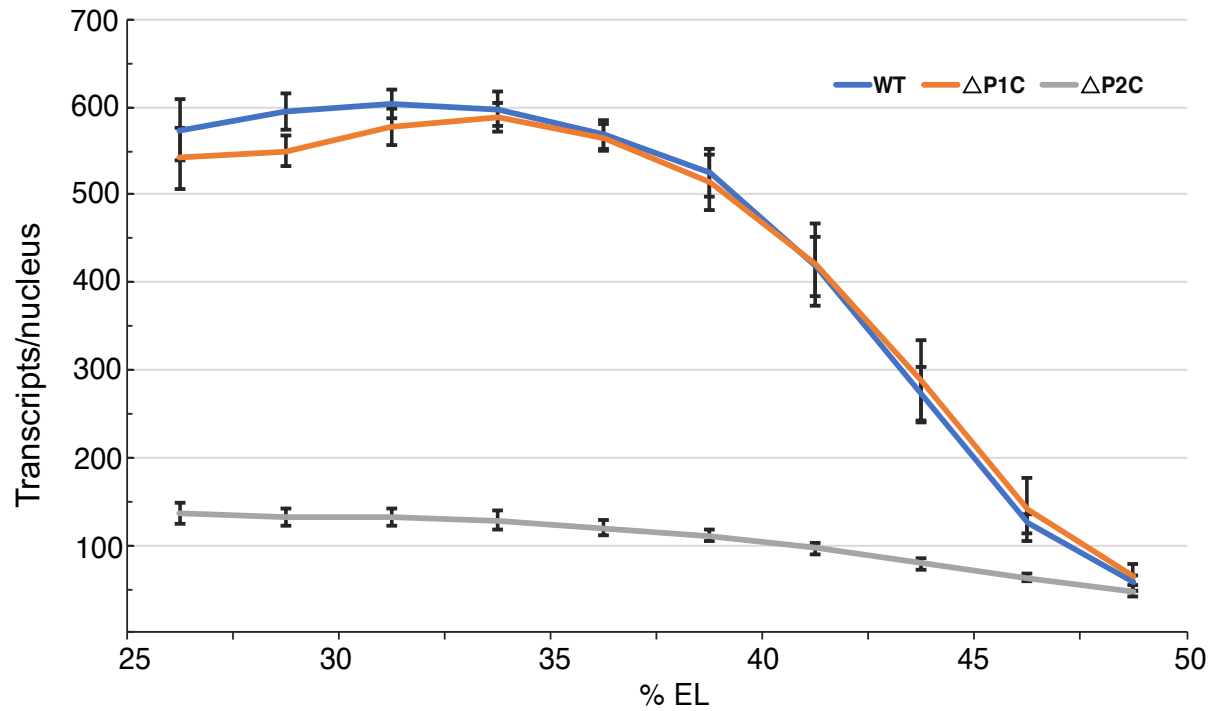

**Figure S1. Related to Figure 2. Quantifying *hb* mRNA expression in wt,  $\Delta$ P2C, and  $\Delta$ P1C embryos**

Numbers of transcripts per nucleus as a function of AP position (% Egg Length, 0% = anterior tip) are presented. Numbers of embryos measured for each AP bin are at least 5 for wt, 3 for  $\Delta$ P2C and 4 for  $\Delta$ P1C. Error bars represent standard errors of the mean (SEM).

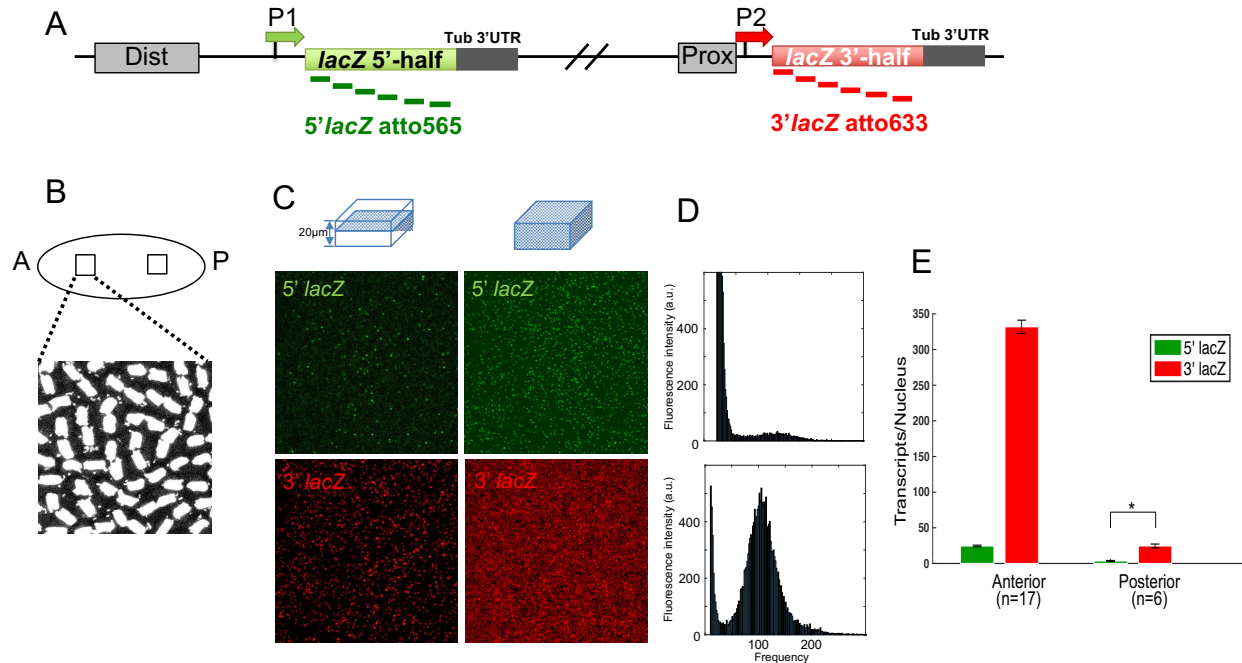

**Figure S2. Related to Figure 2 and STAR Methods. A dual reporter system to quantify transcripts from P1 and P2**

**A.** Schematic of the wt 5.6 kb *hb* dual reporter gene. The green and red bars represent smFISH probes complementary to the 5' *lacZ* and 3' *lacZ* reporters, respectively. **B.** Schematic of imaged region in an embryo and the DAPI channel of telophase nuclei from a NC13 embryo. **C.** Images showing cytoplasmic spots for a single frame (left) and for z-projection (right). **D.** Histograms of cytoplasmic spot distribution. X axis: number of spots. Y axis: spot intensity. **E.** Numbers of transcripts per nucleus in anterior and posterior regions of the embryo for the wt 5.6 reporter.

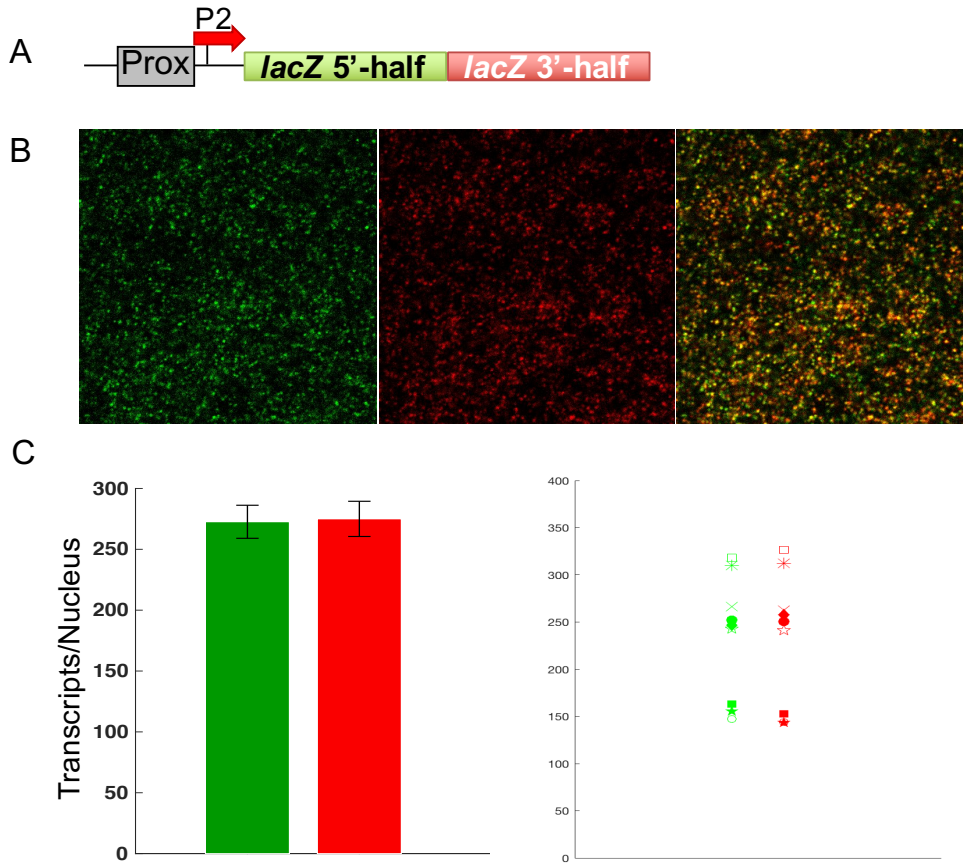

**Figure S3. Related to STAR Methods. Testing detection efficiencies for the 5' and 3' *lacZ* probes**

**A.** Schematic of the control reporter with full length *lacZ*. **B.** Images of spots for 5' *lacZ* (green), 3' *lacZ* (red), and overlapping channels. **C.** Left: number of transcripts per nucleus detected by Atto 565 for 5' *lacZ* (green) and by Atto 633 for 3' *lacZ* (red). Right: a plot showing that for every measured embryo (at varying nuclear cycles) the number of transcripts for 5' *lacZ* (green) is very similar to that detected for 3' *lacZ* (red). Datapoints with the same symbol represent data from the same embryo.

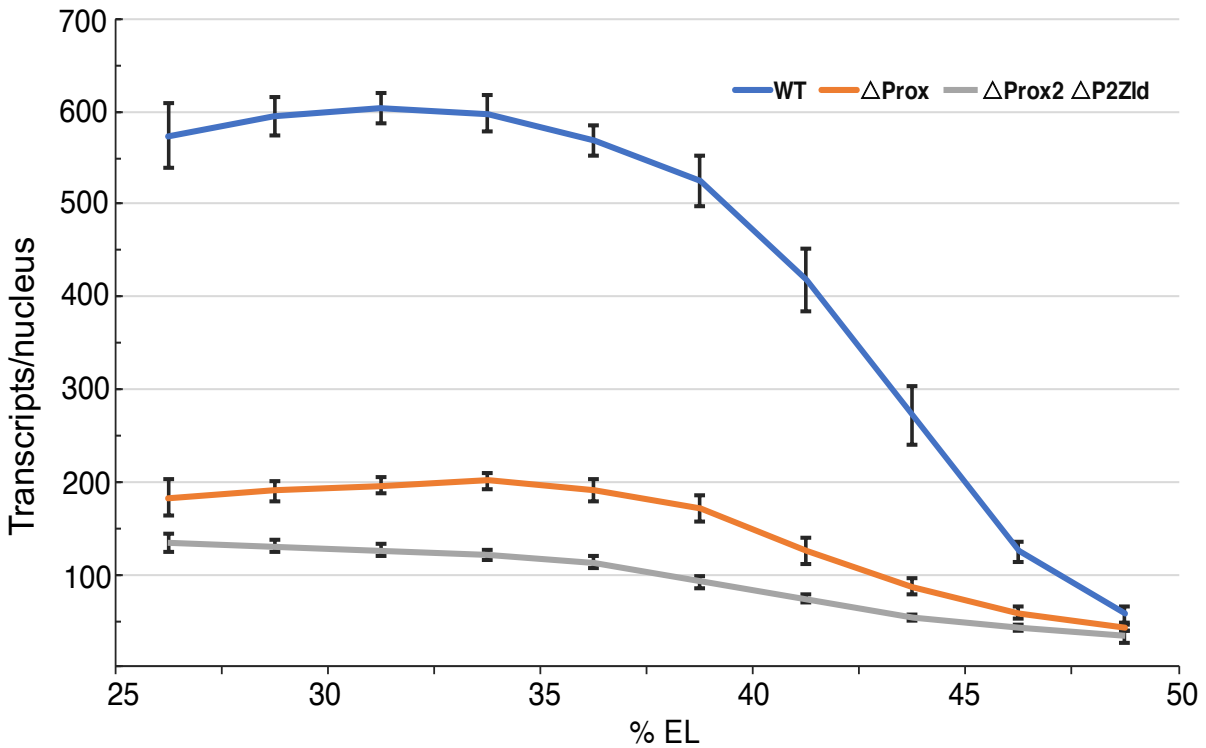

**Figure S4. Related to Figure 5. Quantifying *hb* mRNA expression in wt,  $\Delta$ Prox, and  $\Delta$ Prox  $\Delta$ P2Zld embryos**

Numbers of transcripts per nucleus as a function of AP position (% Egg Length, 0% = anterior tip) are presented. Numbers of embryos measured for each AP bin are at least 5 for wt, 4 for  $\Delta$ Prox and 5 for  $\Delta$ Prox  $\Delta$ P2Zld. Error bars represent standard errors of the mean (SEM).

**Table S1. Related to Figure 2, 5, and STAR Methods. gRNA sequences used for CRISPR/Cas9 experiments and sequences at the junctions of deletion break point**

|                           |                        |
|---------------------------|------------------------|
| ΔP2C gRNA 1               | GTTATATATCGCTCAGGTAGA  |
| ΔP2C gRNA 2               | GATTTGTCGGGATTTTCGTA   |
| ΔP1C gRNA 1               | GTTGGCGAGTGCACGTGTTGTG |
| ΔP1C gRNA 2               | GCGTTTCGTCCCTTGGATGTT  |
| ΔProx/ΔProx ΔP2Zld gRNA 1 | GAGGAGTAGGCAGCTAGCGT   |
| ΔProx gRNA 2              | GGTAGACGGATGCACGCGTCA  |
| ΔProx ΔP2Zld gRNA 2       | GTTATATATCGCTCAGGTAGA  |
| ΔDist gRNA 1              | GTCTCAACAGAAGTTCCTTCG  |
| ΔDist gRNA 2              | GCCCAAATATTCCACATAAAC  |

>ΔP2C

-----attP-loxP-dsRed-loxP-attP-----  
**CGCGTGCATCCGTCT** | **CATATGCACACCTGC**-----**CAGTTGGGGCACTAC** | **GAAAATCCCGACAAA**

>ΔP1C

-----attP-loxP-dsRed-loxP-attP-----  
**GGCGAGTGCACGTGT** | **GTAGTGCCCAACTG**-----**GCAGGTGTGCATATG** | **ATCCAAAGGACGAAA**

>ΔProx

-----attP-loxP-dsRed-loxP-attP-----  
**ACGAAACTGCCACG** | **GTAGTGCCCAACTG**-----**CAGTTGGGGCACTAC** | **CGCGTGCATCCGTCT**

>ΔProx ΔP2Zld

-----attP-loxP-dsRed-loxP-attP-----  
**ACGAAACTGCCACG** | **GTAGTGCCCAACTG**-----**CAGTTGGGGCACTAC** | **ACCTGAGCGATATAT**

>ΔDist

-----attP-loxP-dsRed-loxP-attP-----  
**CAATCTTCCCCTCGA** | **GTAGTGCCCAACTG**-----**GCAGGTGTGCATATG** | **AACAGGAGATTGAAT**

**Table S2. Related to Figure 2, 3, 5, and STAR Methods. Sequences at the junctions of promoter deletions and replacements tested in dual reporter experiments**

|                          |                                                                                |
|--------------------------|--------------------------------------------------------------------------------|
|                          | 517 bp<br>▽                                                                    |
| >ΔP2C                    | <b>CTAATCCCTTGACGC   CTCGAGATCTGTCGA</b>                                       |
|                          | 261 bp<br>▽                                                                    |
| >ΔProx                   | <b>ACTGCCACGCTAGC   GTGCATCCGTCTACC</b>                                        |
|                          | 12 bp<br>▽                                                                     |
| >ΔP2Zld                  | <b>CTAATCCCTTGACGC   ACCTGAGCGATATAT</b>                                       |
|                          | 273 bp<br>▽                                                                    |
| >ΔProx ΔP2Zld            | <b>ACTGCCACGCTAGC   ACCTGAGCGATATAT</b>                                        |
|                          | 859 bp<br>▽                                                                    |
| >ΔDist                   | <b>TAAGCTTGGCGCGCC   CATTAATTCCGAACT</b>                                       |
|                          |                                                                                |
| >P1 replaced by P2       | -----516 bp-----                                                               |
|                          | <b>ACTGTTGTGAGGAGC   TGCATCCGTCTACCT-----GAACTGGGAGACGAC   CCATGGTGATCACCT</b> |
|                          |                                                                                |
| >P1C replaced by P2C     | -----120 bp-----                                                               |
|                          | <b>ACTGTTGTGAGGAGC   TGCATCCGTCTACCT-----ATATACTTGCAAATC   CCAAACATCCAAAGG</b> |
|                          |                                                                                |
| >P1C/2 replaced by P2C/2 | -----59 bp-----                                                                |
|                          | <b>ACTGTTGTGAGGAGC   TGCATCCGTCTACCT-----ATTGTTCAAGTCAGTC   TCCGAGTCCGAAAA</b> |
|                          |                                                                                |
| >P2 replaced by P1       | -----546 bp-----                                                               |
|                          | <b>TAATCCCTTGACGCG   AGTGAGGAGATTTTC-----ACTGTCCGCAAGGTA   CTCGAGATCTGTCGA</b> |
|                          |                                                                                |
| >P2C replaced by P1C     | -----120 bp-----                                                               |
|                          | <b>TAATCCCTTGACGCG   AGTGAGGAGATTTTC-----GAAATACAAAATAA   CTTACGAAAATCCCG</b>  |

Green represents sequence from P1 and red represents sequence from P2.

**Table S3. Related to Figure 4 and STAR Methods. Core promoter sequences for constructs shown in Figure 4.**

**P1 core**  +1  
AGTGAGGAGATTTTCAGCTATTAGAAGAGCCCGCTGAGCGTGAGTTTGGTTCAGTTGTGCTCCGAGTCCCGAAAACGAAAGTCGCCAGCATTGACAGGCAGCCACTGAAATACAAAAATAA

**P2 core**  
TGCATCCGTCTACCTGAGCGATATATAAACTAATGCCTGTTGCAATTGTTTCAGTCAGTCACGAGTTTGTTACCCTGCGACAACACAACAGAAGCAGCACCAATAATATACTTGCAAATC

**P2C  $\Delta$ TATA at P1**  
TGCATCCGTCTACCTGAGCGATAGAAGAGCTAATGCCTGTTGCAATTGTTTCAGTCAGTCACGAGTTTGTTACCCTGCGACAACACAACAGAAGCAGCACCAATAATATACTTGCAAATC

**P2C  $\Delta$ Zld(S) at P1**  
AGTGAGGAGATTTTCAGCTATTAGAAGAGCCCGCTGAGCGTGAGTTTGGTTCAGTTGTGCTCCGAGTCCCGAAAACGAAAGTCGCCAGCATTGACAGGCAGCCACTGAAATACAAAAATAA

**P1 + Zld(S)**  
AGTGAGGAGCTACCTGGCTATTAGAAGAGCCCGCTGAGCGTGAGTTTGGTTCAGTTGTGCTCCGAGTCCCGAAAACGAAAGTCGCCAGCATTGACAGGCAGCCACTGAAATACAAAAATAA

**P1 change Zld(W->S)**  
AGTGAGGAGATTTTCAGCTATTAGAAGAGCCCGCTGAGCGTGAGTTTGGTTCAGTTGTGCTCCGAGTCCCGAAAACGAAAGTCGCCAGCATTGACAGGTAGCCACTGAAATACAAAAATAA

**P1 + Zld(S) + TATA**  
AGTGAGGAGCTACCTGGCTATTATAAGAGCCCGCTGAGCGTGAGTTTGGTTCAGTTGTGCTCCGAGTCCCGAAAACGAAAGTCGCCAGCATTGACAGGCAGCCACTGAAATACAAAAATAA

**P1 change Zld(W->S) + TATA**  
AGTGAGGAGATTTTCAGCTATTATAAGAGCCCGCTGAGCGTGAGTTTGGTTCAGTTGTGCTCCGAGTCCCGAAAACGAAAGTCGCCAGCATTGACAGGTAGCCACTGAAATACAAAAATAA

**P1 + Zld(S) + TATA + InrInr**  
AGTGAGGAGCTACCTGGCTATTATATAAACCCGCTGAGCGTGAGTTTGGTTCAGTCAGTCTCCGAGTCCC GAAAACGAAAGTCGCCAGCATTGACAGGCAGCCACTGAAATACAAAAATAA

**P1 + Zld(W) + TATA + InrInr**  
AGTGAGGAGCTGCCTGGCTATTATATAAACCCGCTGAGCGTGAGTTTGGTTCAGTCAGTCTCCGAGTCCC GAAAACGAAAGTCGCCAGCATTGACAGGCAGCCACTGAAATACAAAAATAA

**P1 + Zld(S) + 10bp + TATA + InrInr**  
AGTGCTACCTGTTTCAGCTATTATATAAACCCGCTGAGCGTGAGTTTGGTTCAGTCAGTCTCCGAGTCCC GAAAACGAAAGTCGCCAGCATTGACAGGCAGCCACTGAAATACAAAAATAA

Green represents sequence from P1 and red represents sequence from P2. Motifs (TATA box, Inr, DPE, strong and weak Zld sites) are underlined. +1 indicates the position of TSS for each promoter.
